# Supplementary material
Source: MDPI journal article supplement (https://www.mdpi.com/2311-5637/9/3/217)
Supplement: s1 [file s1]

# Geranyl Diphosphate Synthase (CrtE) Inhibition Using Alendronate Enhances Isoprene Production in Recombinant *Synechococcus elongatus* UTEX 2973: A Step towards Isoprene Biorefinery

Indrajeet Yadav <sup>1</sup>, Akhil Rautela <sup>1</sup>, Agendra Gangwar <sup>1</sup>, Vigya Kesari <sup>2</sup>, Aditya K. Padhi <sup>3</sup> and Sanjay Kumar <sup>1,\*</sup>

<sup>1</sup> Biofuel Research Laboratory, School of Biochemical Engineering, IIT(BHU) Varanasi, Varanasi 221005, Uttar Pradesh, India

<sup>2</sup> Department of Botany, Banaras Hindu University, Varanasi 221005, Uttar Pradesh, India

<sup>3</sup> Laboratory for Computational Biology and Biomolecular Design, School of Biochemical Engineering, IIT(BHU) Varanasi, Varanasi 221005, Uttar Pradesh, India

\* Correspondence: sanjaykr.bce@iitbhu.ac.in

**Supplementary Table S1.** List of primers used.

| Name       | Sequence (5'-3')                               | T <sub>m</sub> (°C) |
|------------|------------------------------------------------|---------------------|
| IspS FP    | CGGAATTCATGCCCTGGCGTGTAATCTGTG                 | 64.4                |
| IspS RP    | CGGGATCCCCTCTAGATTACACGTACATTAATTG             | 63.2                |
| NSI' FP    | GACTAGTCAGCTTAGTCCTGCGCAATCT                   | 51.8                |
| NSI' RP    | GACTAGTCGAAATGTTCTGGACTTGCAGC                  | 52.4                |
| NSI'' FP   | CCTAGGTGAAACAAACCACGGGCA                       | 48.0                |
| NSI'' RP   | CCTAGGGACACCAAAATCACCACG                       | 48.0                |
| NSIII' FP  | GACTAGTCTCGAGATCAGCCAGCTC                      | 57.0                |
| NSIII' RP  | GACTAGTCGACCGACCGATCAACCA                      | 58.0                |
| NSIII'' FP | ATA CCTAGG GACAAGCCGGGGCAG                     | 62.0                |
| NSIII'' RP | ATTCTGTGGATAACCGTATTACCGCCTTTGACAGTCGGCGTCACGG | 51.1                |
| bom FP     | CAAAGGCGGTAATACGGTTATCCACAGAATGCGTCGGTACTGGGTC | 51.1                |
| bom RP     | AGAACATGTGGACTACGCCATAAAAGAGG                  | 58.0                |
| IDI FP     | GCATGACAT ATGCAAACGGAACACGTC                   | 59.7                |
| IDI RP     | CGGGATCCTTATTTAAGCTGGGTAAATGCAG                | 61.7                |
| IspS rt FP | TCGGTGGTGGACTGAAATG                            | 51.1                |

|            |                      |      |
|------------|----------------------|------|
| IspS rt RP | GTCACTGCCTTACGACACT  | 51.1 |
| IDI rt FP  | GCTGTTTAATGCCAAAGGAC | 49.7 |
| IDI rt RP  | GATCACTGCGTCTTCGTTG  | 51.1 |
| rpoA FP    | GACATCTTGCTCAACGTCC  | 51.1 |
| rpoA RP    | CTTCAACTTCAGGGCCAAAG | 51.8 |

**Supplementary Table S2.** Amplification of gene/DNA segment by PCR.

| Gene/DNA segment                                                  |           | Amplification conditions                                                                                                                                                                                                                                                                                    |
|-------------------------------------------------------------------|-----------|-------------------------------------------------------------------------------------------------------------------------------------------------------------------------------------------------------------------------------------------------------------------------------------------------------------|
| <i>IspS</i>                                                       |           | Initial denaturation at 95 °C for 5 min, followed by 30 cycles of denaturation at 95 °C for 30 sec, <b><u>annealing at 57 °C for 20 sec, extension at 72 °C for 2 min</u></b> and final elongation at 72 °C for 10 min                                                                                      |
| <i>IDI</i>                                                        |           | Initial denaturation at 95 °C for 5 min, followed by 30 cycles of denaturation at 95 °C for 30 sec, <b><u>annealing at 55 °C for 20 sec, extension at 72 °C for 1 min</u></b> and final elongation at 72 °C for 10 min                                                                                      |
| NSIII';<br>NSIII''.bom                                            | NSIII'';  | Initial denaturation at 95 °C for 5 min, followed by 30 cycles of denaturation at 95 °C for 30 sec, <b><u>annealing at 55 °C for 20 sec, extension at 72 °C for 1.5 min</u></b> and final elongation at 72 °C for 10 min                                                                                    |
| bom                                                               |           | Initial denaturation at 95 °C for 5 min, followed by 30 cycles of denaturation at 95 °C for 30 sec, <b><u>annealing at 55 °C for 20 sec, extension at 72 °C for 30 sec</u></b> and final elongation at 72 °C for 10 min                                                                                     |
| Semiquantitative<br>PCR of <i>IspS</i> / <i>IDI</i> / <i>rpoA</i> |           | Initial denaturation of 95 °C for 5 min, <b><u>followed by 35 cycles of denaturation at 94 °C for 1 min, annealing 20 sec at gene-specific temperatures (Supplementary Table S1), extension at 72 °C for 30 sec</u></b> with a final elongation at 72 °C for 10 min                                         |
| Verification<br>of genomic<br>integration                         | of<br>DNA | Initial denaturation of 95 °C for 5 min, <b><u>followed by 30 cycles of denaturation at 94 °C for 1 min, annealing 30 sec at gene-specific temperatures (Supplementary Table S1), extension at 72 °C (time according to amplicon size at rate 1 kb/min)</u></b> with a final elongation at 72 °C for 10 min |

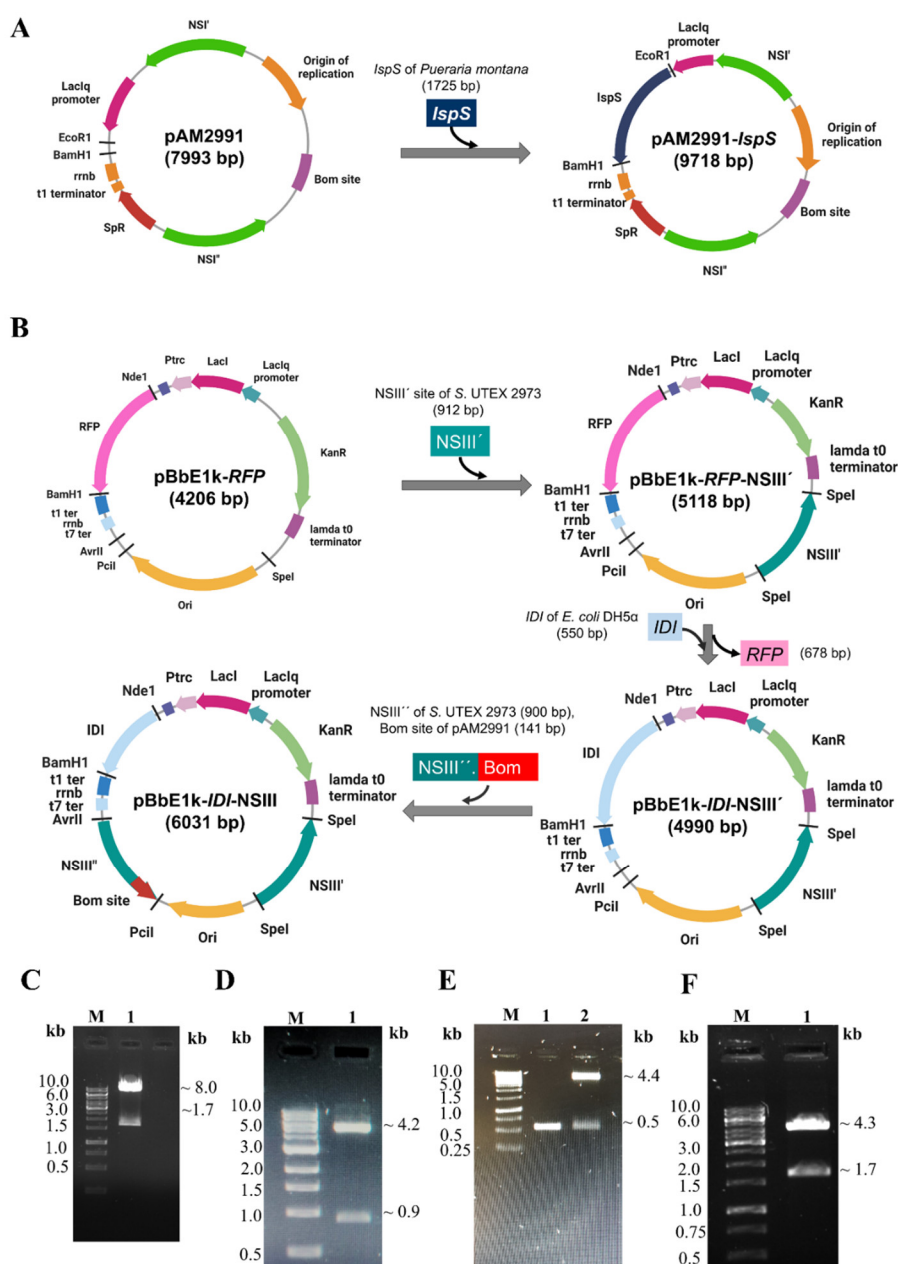

**Supplementary Figure S1.** Plasmid constructs preparation and digestion verification of inserts. (A) Schematic representation of pAM2991-*IspS* construct preparation (B) Scheme of sequential addition of DNA inserts to form BbE1k-*IDI*-NSIII plasmid construct (C) Digestion of pAM2991-*IspS* to verify *IspS* insert by EcoRI and BamHI, M- molecular marker, 1- plasmid digest. (D) Digestion of construct pBbE1k-RFP-NSIII' to verify NSIII' insert by SpeI enzyme, M- molecular marker, 1- plasmid digest. (E) Digestion of construct pBbE1k-*IDI*-NSIII' to verify *IDI* insert by NdeI and BamHI enzymes, M- molecular marker, 1- *IDI* gene (positive control), 2- plasmid digest. (F) Digestion of construct pBbE1k-*IDI*-NSIII to verify NSIII'' insert by NdeI (an additional restriction site of NdeI is present in bom sequence), M- molecular marker, 1- plasmid digest.

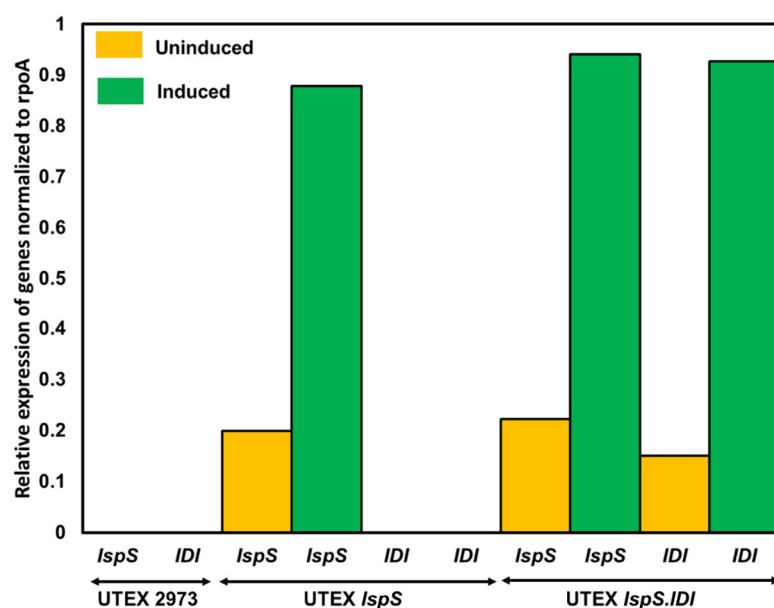

**Supplementary Figure S2.** Densitometric analysis of semi-quantitative RT-PCR to test the expression levels of *IspS*, and *IDI* genes in uninduced and induced (1mM IPTG) conditions using ImageJ 1.53t software. *rpoA* gene was used as an internal control to normalize the expression level.

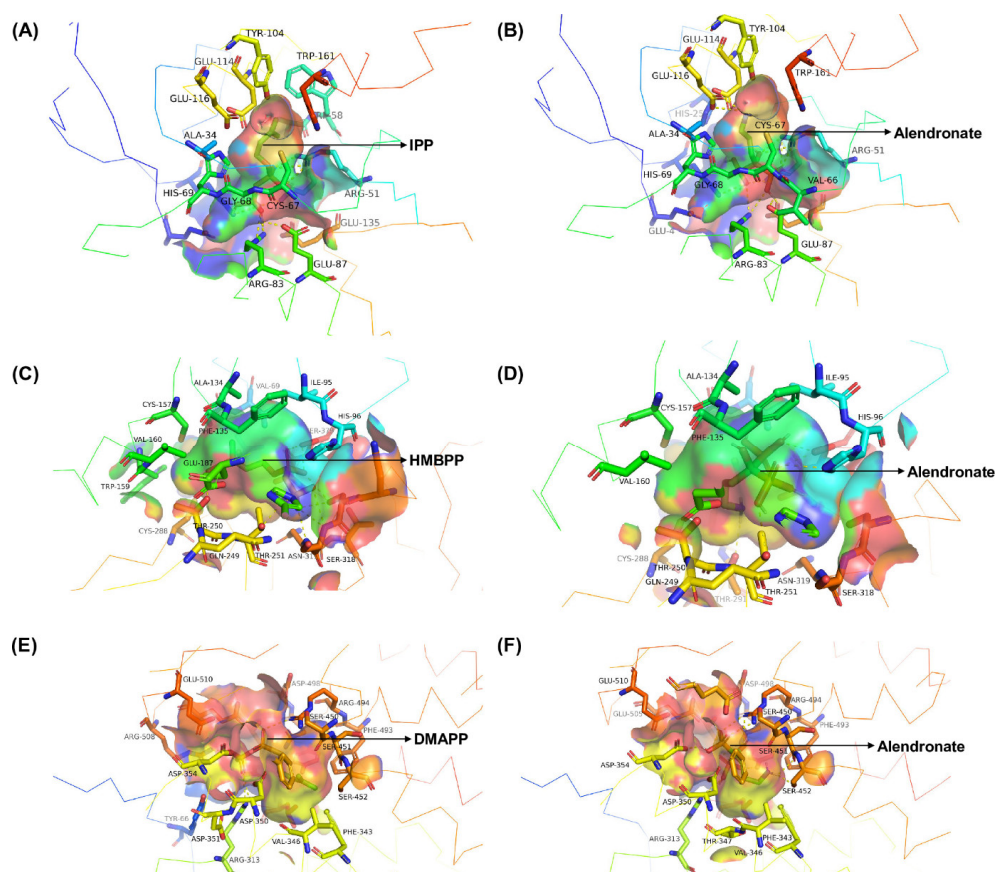

**Supplementary Figure S3.** Lowest energy docked poses of IDI, IspH, and IspS enzymes with their natural substrates and alendronate inhibitor. (A) Docking poses of IDI with IPP and (B) with alendronate (C) Docking pose of IspH with HMBPP and (D) with alendronate (E) Docking poses of IspS with DMAPP and (F) with alendronate. The substrates and alendronate have been labelled and shown as sticks.
